# Supplementary material for: Assessment of precipitation and temperature data from CMIP3 global climate models for hydrologic simulation
Source: Copernicus journal article supplement (doi:10.5194/hess-19-361-2015), 2015-01-21
Supplement: Supplementary file 1 [file hess-19-361-2015-supplement.pdf]

Supplement of Hydrol. Earth Syst. Sci., 19, 361–377, 2015  
<http://www.hydrol-earth-syst-sci.net/19/361/2015/>  
doi:10.5194/hess-19-361-2015-supplement  
© Author(s) 2015. CC Attribution 3.0 License.

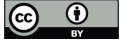

*Supplement of*

## **Assessment of precipitation and temperature data from CMIP3 global climate models for hydrologic simulation**

**T. A. McMahon et al.**

*Correspondence to:* M. C. Peel ([mpeel@unimelb.edu.au](mailto:mpeel@unimelb.edu.au))

## 1 **Supplementary Material**

### 2 **Supplement: Estimating potential evapotranspiration for climate change impact** 3 **assessments**

4 Projected changes in water and energy at the catchment scale are the fundamental basis of all  
5 hydrologic climate change impact assessments. Hydrologic models require time-series of  
6 precipitation and, usually, potential evapotranspiration to represent the interaction of water  
7 and energy within a catchment. Therefore, for hydrologic climate change impact assessments,  
8 an estimate of potential evapotranspiration (PET) is required. For the practitioner the question  
9 is which PET method to adopt? Here we briefly review three questions that influence the  
10 choice of PET equation: (1) does the equation represent all relevant processes; (2) what PET  
11 information does a hydrologic model actually use; and (3) are future projections of variables  
12 used to estimate PET reliable?

#### 13 **S.1 Does the PET equation represent all relevant processes?**

14 McMahon et al. (2013) discuss a range of PET equations used in rainfall-runoff modelling.  
15 Frequently adopted methods to represent PET include Penman (Penman, 1948), Penman-  
16 Monteith (Monteith, 1965), FAO reference crop (Allen et al., 1998), Morton (Morton, 1983)  
17 and pan evaporation data. Ideally to represent future PET conditions the method adopted  
18 should adequately capture all changes in the energy and aerodynamic components of the  
19 evaporative process.

20 The potential danger of using a PET equation that does not adequately represent all relevant  
21 processes is highlighted by recent trends in pan evaporation data. Over the past several  
22 decades the magnitude of evaporation from Class-A pans has decreased (between -1 to -4 mm  
23 year<sup>-2</sup>) while at the same time annual temperatures have risen (Roderick et al., 2009a).  
24 Roderick et al. (2009b) warn against using temperature only PET estimates for climate change  
25 studies as they would suggest that rising temperature would lead to rising evaporative  
26 demand; the opposite of what has been observed from pan data recently. Roderick et al.  
27 (2009b) attribute much of the observed decline in pan evaporation to declines in radiation  
28 and/or wind speed. Donohue et al. (2010), using the Penman formulation and gridded  
29 Australian data (1981-2006), attributed increasing surface temperature with contributing +1.5

1 mm year<sup>-2</sup> toward evaporative demand. However, the temperature contribution was more than  
2 offset by negative contributions from changes in wind speed (-1.3 mm year<sup>-2</sup>), net radiation (-  
3 0.6 mm year<sup>-2</sup>) and actual vapour pressure (-0.4 mm year<sup>-2</sup>) to give an overall decrease in  
4 evaporative demand of -0.8 mm year<sup>-2</sup>. Donohue et al. (2010) also compared the performance  
5 of five formulations of differing complexity namely Thornthwaite (Thornthwaite (1948),  
6 Priestly-Taylor (Priestley and Taylor, 1972), Morton point and areal (Wang et al., 2001) and  
7 Penman (1948)) and preferred Penman, the most complex form, based on its ability to best  
8 capture the dynamics of evaporative demand. Overall, Roderick et al. (2009a, 2009b), Chen et  
9 al. (2005) and Hobbins et al. (2008) conclude that PET estimates based only on T are  
10 problematic, particularly in energy limited environments (cold and polar climates), for climate  
11 change studies.

## 12 **S.2 What PET information does a conceptual hydrologic model actually use?**

13 Whether conceptual hydrologic models require, or make use of, detailed PET data was  
14 assessed by Andréassian et al. (2004) and Oudin et al. (2005a, 2005b). They found that  
15 hydrologic models perform as well (if not better) when calibrated with mean monthly  
16 estimates of PET, or with temperature based estimates of PET, rather than time varying  
17 estimates of PET or more complex Penman based PET (Penman, 1948, Allen et al., 1998).  
18 Catchments used in their studies were located in France (Andréassian et al., 2004; Oudin et  
19 al., 2005a, 2005b), USA (Oudin et al., 2005a, 2005b) and Australia (Oudin et al., 2005a,  
20 2005b). The vast majority of their catchments have a temperate climate (not strongly water or  
21 energy limited on an annual basis). Under these conditions the hydrologic models appear to  
22 be largely insensitive to the complexity of the PET data used to drive them. During calibration  
23 conceptual hydrologic models are flexible enough to extract the PET information they need  
24 from whichever PET data (simple or complex) are used (see Chapman, 2003). Thus, as long  
25 as PET estimates are broadly correct in terms of seasonal pattern and annual mean and the  
26 hydrologic model was calibrated on that PET data then model performance is likely to be  
27 acceptable. For example, Oudin et al. (2005b) tested 27 PET formulations, of varying  
28 complexity, over 308 catchments using four daily conceptual models and proposed a simple  
29 temperature (mean daily temperature for a given Day-of-Year) and extra-terrestrial radiation  
30 (estimated from latitude and Day-of-Year) method that performed as well as the daily Penman

1 method. In summary, a complex estimate of PET is not necessary for successful hydrologic  
2 modelling in catchments that are not strongly water or energy limited on an annual basis.

### 3 **S.3 Are future projections of variables used to estimate PET reliable?**

4 In the previous two sections we have seen that a simple PET formulation may be good enough  
5 for hydrologic modelling, but not good enough to represent projected changes in PET. The  
6 final question relates to whether GCMs are able to provide reliable outputs on which to base a  
7 complex estimate of PET? Kay and Davies (2008) used IPCC third assessment report runs for  
8 5 GCMs and 8 regional climate models nested within the Hadley Centre GCM to calculate  
9 PET using Penman-Monteith and the temperature/radiation (T/R) method of Oudin et al.  
10 (2005b). They compared their two PET estimates derived from GCM data against observation  
11 based gridded values of Penman-Monteith PET for Britain. Overall, the GCM estimate of  
12 PET using T/R performed better than GCM Penman-Monteith at reproducing observed  
13 Penman-Monteith for all climate models. Future values of PET based on Penman-Monteith  
14 were also more variable than those based on T/R, which they suggest may reflect reliability  
15 issues with GCM variables, other than temperature, used to estimate Penman-Monteith.  
16 Kingston et al. (2009) also highlight reliability issues with GCM inputs to the Penman-  
17 Monteith equation. Although confidence in GCM-simulated temperature is generally high,  
18 Kingston et al. (2009, page 4) note “less confidence can be placed in cloud cover and vapour  
19 pressure”, which influence GCM-simulation estimates of net radiation at the evaporating  
20 surface and relative humidity. Overall, Kay and Davies (2008) suggest hydrologic modellers  
21 should be pragmatic and use as many GCMs as possible and estimate PET in a consistent way  
22 for any impact analysis.

### 23 **S.4 Discussion and summary**

24 Ideally, estimates of PET should be based on methodologies that include all key evaporative  
25 processes to ensure future changes in PET are accurately represented. A Penman based  
26 equation is thus an ideal methodology to adopt. However, the reliability of future PET  
27 estimates is dependent on the reliability of GCM projections of input variables. For example,  
28 the Penman equation requires inputs of air temperature, net radiation at the evaporating  
29 surface, wind speed and relative humidity. In this paper we have found that mean monthly

1 and mean annual temperature are well reproduced by CMIP3 GCMs. However, reported  
2 confidence in GCM estimates of net radiation at the evaporating surface, wind speed and  
3 relative humidity is much lower. For example, Johnson and Sharma (2009) have shown that in  
4 terms of their Variable Convergence Score (VCS, scaled between 0 and 100, where 100 is  
5 perfect convergence between GCMs) the predictions of the surface wind and specific  
6 humidity have VCS scores of approximately 40, net longwave radiation about 20 compared  
7 with surface temperature and net shortwave radiation of about 70 and precipitation at 10.  
8 Therefore, although Penman based methodologies have the capacity to represent future trends  
9 due to changes in all key evaporative processes, GCM projections of those process variables,  
10 other than temperature, may be unrealistic. Thus at this time PET based on Penman may  
11 actually increase uncertainty in future PET, as seen in Kay and Davies (2008). PET based on  
12 Penman will be preferable once GCM projections of net radiation at the evaporating surface,  
13 wind speed and relative humidity become more reliable.

14 As GCM projections of temperature are considered reliable, here we adopt temperature as a  
15 surrogate for PET. Such an approach is likely to provide sufficient PET information for  
16 successful hydrologic modelling if the model is calibrated on that data. However, by adopting  
17 this approach we acknowledge that the projected trend in PET will be an increase, when in  
18 reality the trend may increase or decrease due to changes in temperature, net radiation at the  
19 evaporating surface, wind speed and/or relative humidity. We note the error in PET trend is  
20 unlikely to be important for hydrologic modelling of water limited catchments, where changes  
21 in precipitation are the main driver of changes in runoff. However, in energy limited  
22 catchments, PET is a key driver of runoff and errors in PET trend will result in errors in  
23 runoff trend.

## 24 **A.5 References**

25 Allen, R. G., Pereira, L. S., Raes, D., and Smith, M.: Crop evapotranspiration Guidelines for  
26 computing crop water requirements FAO Irrigation and Drainage Paper 56. Food and  
27 Agriculture Organization of the United Nations, 1998.

1 Andréassian, V., Perrin, C., and Michel, C.: Impact of imperfect potential evapotranspiration  
2 knowledge on the efficiency and parameters of watershed models, *J. Hydrol.*, 286, 19-35,  
3 2004.

4 Chapman, T. G.: Estimation of evaporation in rainfall-runoff models. MODSIM 2003  
5 International Congress on Modelling and Simulation, Townsville, Australia, 2003.

6 Chen, D., Gao G., Xu C-Y., Guo, J., and Ren, G.: Comparison of the Thornthwaite method  
7 and pan data with the standard Penman-Monteith estimates of reference evapotranspiration in  
8 China, *Clim. Res.*, 28, 123-132, 2005.

9 Donohue, R. J., McVicar, T. R., and Roderick, M. L.: Assessing the ability of potential  
10 evaporation formulations to capture the dynamics in evaporative demand within a changing  
11 climate, *J. Hydrol.*, 386, 186-197, 2010.

12 Hobbins, M. T., Dai, A., Roderick, M. L., and Farquhar, G. D.: Revisiting the  
13 parameterization of potential evaporation as a driver of long-term water balance trends,  
14 *Geophys. Res. Lett.*, 35, L12403, doi:10.1029/2008GL033840, 2008.

15 Johnson, F. M. and Sharma, A.: Measurement of GCM skill in predicting variables relevant  
16 for hydroclimatological assessments, *Journal of Climate*, 22, 4373-4382, 2009b.

17 Kay, A. L., and Davies, H. N.: Calculating potential evaporation from climate model data: A  
18 source of uncertainty for hydrological climate change impacts, *J. Hydrol.*, 358, 221-239,  
19 2008.

20 Kingston, D. G, Todd, M. C., Taylor, R. G., Thompson, J. R., and Arnell, N. W.: Uncertainty  
21 in the estimation of potential evapotranspiration under climate change, *Geophys. Res. Lett.*,  
22 36, L20403, 2009.

23 McMahon, T. A., Peel, M. C., Lowe, L., Srikanthan, R., and McVicar, T. R.: Estimating  
24 actual, potential, reference crop and pan evaporation using standard meteorological data: a  
25 pragmatic synthesis, *Hydrol. Earth Syst. Sci.*, 17, 1331-1363, 2013.

26 Monteith, J. L.: Evaporation and environment, In Fogg, G.E. (ed), *The state and movement of*  
27 *water in living organisms*, Symposium Society Experimental Biology, 19, 205-234.,  
28 Cambridge University Press, London, 1965.

- 1 Morton, F. I.: Operational estimates of areal evapotranspiration and their significance to the  
2 science and practice of hydrology, *J. Hydrol.*, 66, 1–76, 1983.
- 3 Oudin, L., Michel, C., and Anctil, F.: Which potential evapotranspiration input for a lumped  
4 rainfall-runoff model? Part 1 – Can rainfall-runoff models effectively handle detailed  
5 potential evapotranspiration inputs? *J. Hydrol.*, 303, 275-289, 2005a.
- 6 Oudin, L., Hervieu, F., Michel, C., Perrin, C., Andréassian, V., Anctil, F., and Loumagne, C.:  
7 Which potential evapotranspiration input for a lumped rainfall-runoff model? Part 2 –  
8 Towards a simple and efficient potential evapotranspiration model for rainfall–runoff  
9 modelling, *J. Hydrol.*, 303, 290-306, 2005b.
- 10 Penman, H. L.: Natural evaporation from open water, bare soil and grass, *Proceedings Royal*  
11 *Society London, A*, 193, 120-145, 1948.
- 12 Priestley, C. H. B., and Taylor, R.J.: On the assessment of surface heat flux and evaporation  
13 using large scale parameters, *Mon. Weather Rev.*, 100, 81-92, 1972.
- 14 Roderick, M. L., Hobbins, M. T., and Farquhar, G.D.: Pan Evaporation Trends and the  
15 Terrestrial Water Balance. I. Principles and Observations, *Geography Compass*, 3(2), 746-  
16 760, 2009a.
- 17 Roderick, M. L., Hobbins, M. T., and Farquhar, G. D.: Pan Evaporation Trends and the  
18 Terrestrial Water Balance. II. Energy Balance and Interpretation, *Geography Compass*, 3(2),  
19 761-780, 2009b.
- 20 Thornthwaite, C. W.: An approach toward a rational classification of climate, *Geogr. Rev.*,  
21 38, 55-94, 1948.
- 22 Wang, Q. J., Chiew, F. H. S., McConachy, F. L. N., James, R., de Hoedt, G. C., and Wright,  
23 W. J.: *Climatic Atlas of Australia Evapotranspiration*. Bureau of Meteorology,  
24 Commonwealth of Australia, 2001.

25

26
